# Supplementary material for: Hydrogen evolution reaction mechanisms in thiosemicarbazone metal complexes: a combined theoretical and experimental investigation on the impact of proton source
Source: Royal Society of Chemistry journal article supplement (doi:10.1039/d4dt03507k), 2025-01-01
Supplement: d4dt03507k1.pdf [file d4dt03507k1.pdf]

## Supporting Information for

### Hydrogen Evolution Reaction Mechanisms in Thiosemicarbazone Metal Complexes: A Combined Theoretical and Experimental Investigation on the Impact of Proton Source

Jana Mehrez,<sup>a</sup> Alexandre Barrozo,<sup>a</sup> Léa Delmotte,<sup>a</sup> Renaud Hardré,<sup>a</sup> Michael Papadakis\*<sup>a</sup> and Maylis Orio\*<sup>a</sup>

<sup>a</sup> Aix-Marseille Univ, CNRS, Centrale Med, iSm2, Marseille, France.

Correspondence should be addressed to [michail.papadakis@univ-amu.fr](mailto:michail.papadakis@univ-amu.fr) or [maylis.orio@univ-amu.fr](mailto:maylis.orio@univ-amu.fr)

## Table of Contents

|                                             |           |
|---------------------------------------------|-----------|
| <b>1. Electrocatalytic proton reduction</b> | <b>2</b>  |
| <b>2. Gas analysis</b>                      | <b>3</b>  |
| <b>3. UV-vis Spectroscopy</b>               | <b>4</b>  |
| <b>4. Benchmarking of performances</b>      | <b>5</b>  |
| <b>5. DFT calculations</b>                  | <b>7</b>  |
| <b>6. References</b>                        | <b>20</b> |

## 1. Electrocatalytic proton reduction

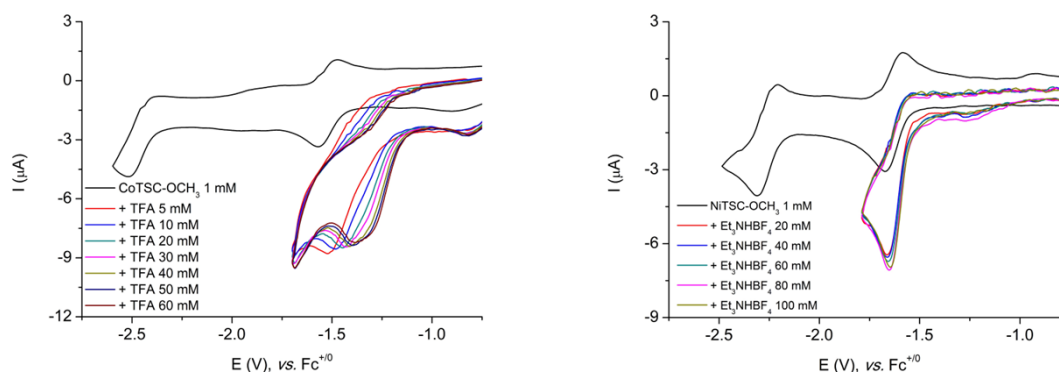

**Figure S1.** Successive cyclic voltammograms of a DMF solution (0.1 M NBu<sub>4</sub>PF<sub>6</sub>) with 1 mM of (left) CoTSC-OCH<sub>3</sub> in the presence of increasing amounts of TFA and (right) NiTSC-OCH<sub>3</sub> in the presence of increasing amounts of Et<sub>3</sub>NHBF<sub>4</sub>. Scan rate 500 mV.s<sup>-1</sup> at a glassy carbon working electrode.

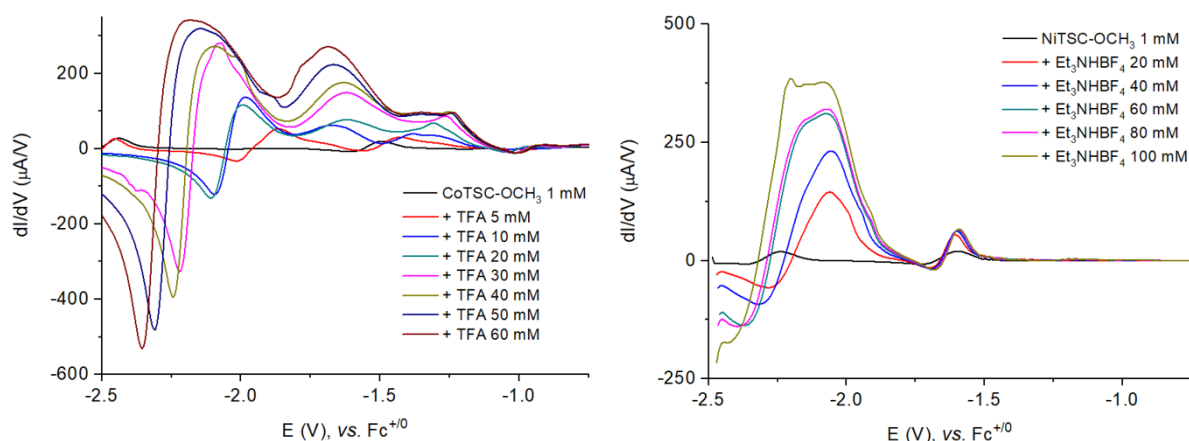

**Figure S2.** First derivative of the cyclic voltammograms of a DMF solution (0.1 M NBu<sub>4</sub>PF<sub>6</sub>) with 1 mM of (left) CoTSC-OCH<sub>3</sub> in the presence of increasing amounts of TFA and (right) NiTSC-OCH<sub>3</sub> in the presence of increasing amounts of Et<sub>3</sub>NHBF<sub>4</sub>. Scan rate 500 mV.s<sup>-1</sup> at a glassy carbon working electrode.

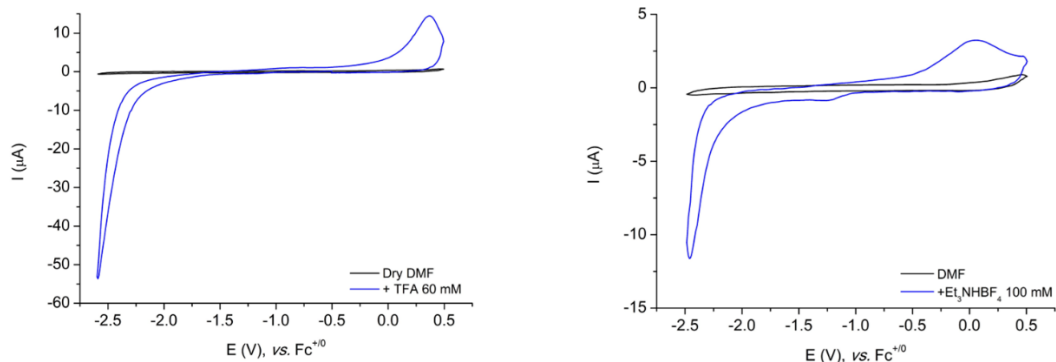

**Figure S3.** Successive cyclic voltammograms of (left) CoTSC-OCH<sub>3</sub> and (right) NiTSC-OCH<sub>3</sub> complexes recorded after electrocatalysis upon washing the glassy carbon electrode and immersion into a fresh solution of DMF (0.1 M NBu<sub>4</sub>PF<sub>6</sub>, black lines) and in the presence of (left) 60 mM of TFA and (right) 100 mM of Et<sub>3</sub>NHBF<sub>4</sub> (blue lines).

## 2. Gas Analysis

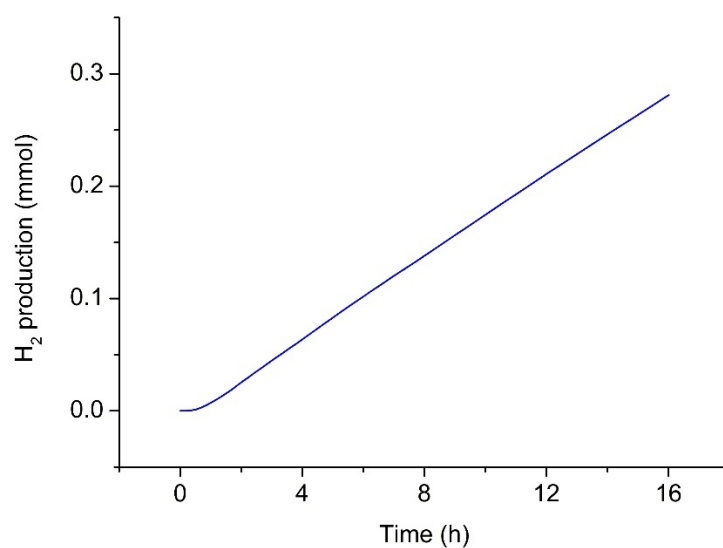

**Figure S4.** Hydrogen evolution detected by gas chromatography during bulk electrolysis experiments at -1.6 V vs. Fc<sup>+0</sup> using a pool mercury working electrode. The electrolytic solution contains 0.1 M NBu<sub>4</sub>PF<sub>6</sub> in DMF, 60 mM TFA and 1 mM of CoTSC-OCH<sub>3</sub>.

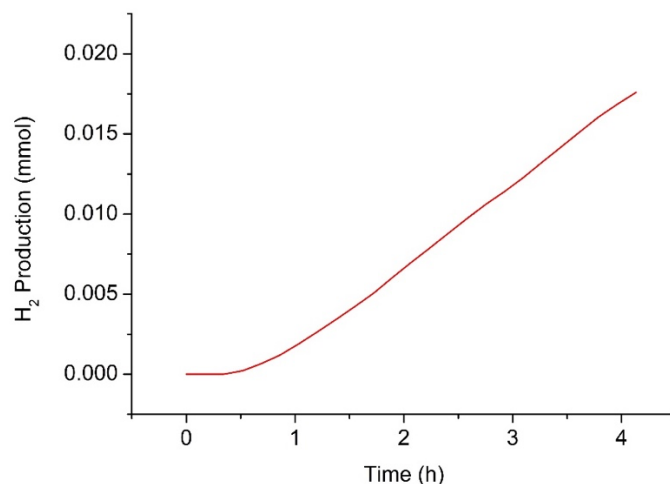

**Figure S5.** Hydrogen evolution detected by gas chromatography during bulk electrolysis experiments at  $-2.1$  V vs.  $\text{Fc}^{+/0}$  using a pool mercury working electrode. The electrolytic solution contains  $0.1$  M  $\text{NBu}_4\text{PF}_6$  in DMF,  $100$  mM  $\text{Et}_3\text{NHBF}_4$  and  $1$  mM of  $\text{NiTSC-OCH}_3$ .

### 3. UV-vis Spectroscopy

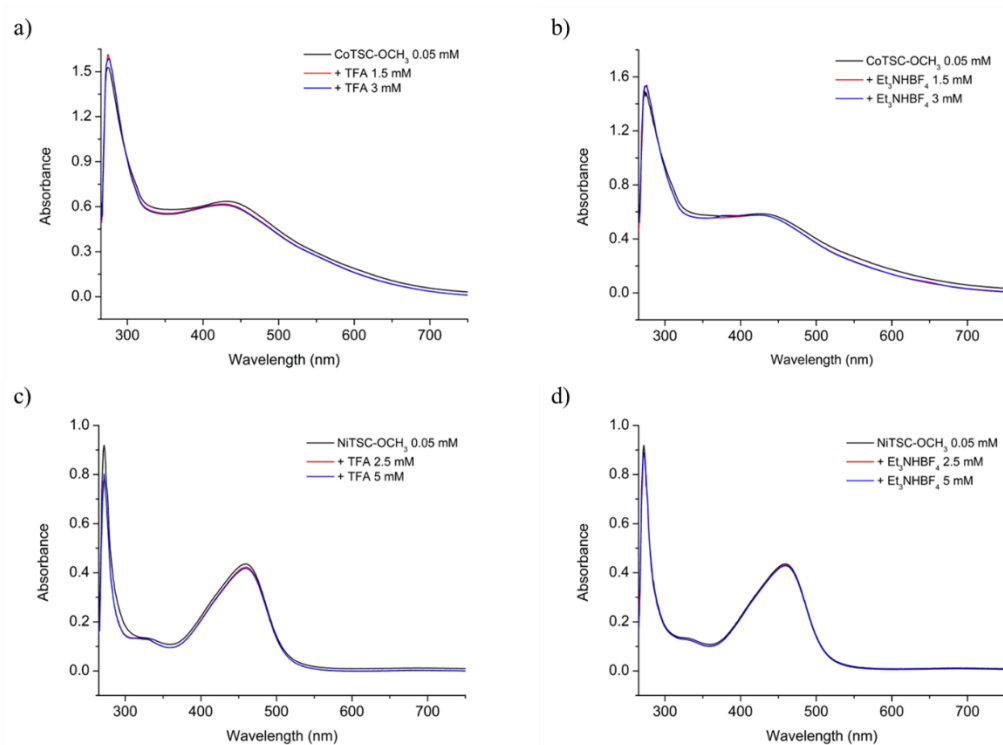

**Figure S6.** Electronic absorption spectra of  $0.05$  mM solutions of a)  $\text{CoTSC-OCH}_3$  complexes in DMF in the absence (black line) and in the presence (30 and 60 equivalents, blue and red lines, respectively) of TFA, b)  $\text{CoTSC-OCH}_3$  complexes in DMF in the absence (black line) and in the presence (30 and 60 equivalents, blue and red lines, respectively) of  $\text{Et}_3\text{NHBF}_4$ , c)  $\text{NiTSC-OCH}_3$  complexes in DMF in the absence (black line) and in the presence (50 and 100 equivalents, blue and red lines, respectively) of TFA and d)  $\text{NiTSC-OCH}_3$  complexes in DMF in the absence (black line) and in the presence (50 and 100 equivalents, blue and red lines, respectively) of  $\text{Et}_3\text{NHBF}_4$ .

## 4. Benchmarking of performances

### 4.1. TOF calculations from controlled potential electrolysis experiments (CPE)

Based on the analysis we conducted for NiTSC-OCH<sub>3</sub>,<sup>3</sup> we evaluated the TOF values of the complexes from the electrolysis data as proposed by Saveant and co-workers.<sup>4</sup> Equations 3-6 were used for the calculation under the assumption that the electron transfer to the catalyst is fast and the Nernst law is obeyed. In these equations,  $i_{el}$  is the current during electrolysis,  $F$  is Faraday's constant ( $F = 96500 \text{ C}\cdot\text{mol}^{-1}$ ),  $E_{appl}$  is the applied potential during electrolyses ( $E_{appl} = -1.70 \text{ V vs. Fc}^{+/0}$ ),  $E_{1/2}$  is the half-wave potential for the catalytic wave,  $A$  is the surface area of the mercury-pool working electrode ( $A \sim 0.47 \text{ cm}^2$ ),  $D_{cat}$  is the diffusion coefficient,  $[Cat]$  is the concentration of the catalyst ( $[Cat] = 1 \text{ mM}$ ),  $Q_{el}$  is the charge passed during the electrolysis,  $FY$  is the Faradaic yield,  $t$  is the electrolysis time and  $TOF_{max}$  is the maximum turnover frequency obtained from CVs. Electrolysis experiments were conducted at potentials close to the half-wave potentials of the catalytic processes and so TOF values determined from electrolysis were equated to  $TOF_{max}$  values.

$$TOF = \frac{i_{el}^2(1+\exp[\frac{F}{RT}(E_{appl}-E_{1/2})])}{F^2A^2D_{cat}[Cat]^2} \quad (3)$$

$$i_{el} = \frac{Q_{el}\cdot FY}{t} \quad (4)$$

$$i_p = 0.446FA[Cat]\sqrt{\frac{FvD_{cat}}{RT}} \quad (5)$$

$$TOF = \frac{TOF_{max}}{1+\exp[\frac{F}{RT}(E_{appl}-E_{1/2})]} \quad (6)$$

**Table S1.** Calculated TOF values and HER production data for CoTSC-OCH<sub>3</sub> and NiTSC-OCH<sub>3</sub> with TFA and Et<sub>3</sub>NH<sup>+</sup>.

| Complex / proton source                                  | Time (h) | Q (C) | FY (%) | Total H <sub>2</sub> (mmol) | TON | TOF (s <sup>-1</sup> ) |
|----------------------------------------------------------|----------|-------|--------|-----------------------------|-----|------------------------|
| CoTSC-OCH <sub>3</sub> / TFA                             | 4        | 14.4  | 79     | 0.063                       | 8   | 96                     |
| CoTSC-OCH <sub>3</sub> / TFA                             | 16       | 61.9  | 88     | 0.300                       | 35  | 117                    |
| NiTSC-OCH <sub>3</sub> / Et <sub>3</sub> NH <sup>+</sup> | 4        | 5.5   | 58     | 0.017                       | 2   | 24                     |

**Table S2.** Calculated TOF values and HER production data for CoTSC-OCH<sub>3</sub> and NiTSC-OCH<sub>3</sub> with Et<sub>3</sub>NH<sup>+</sup> and TFA.<sup>6</sup>

| Complex / proton source                                  | Time (h) | Q (C) | FY (%) | Total H <sub>2</sub> (mmol) | TON | TOF (s <sup>-1</sup> ) |
|----------------------------------------------------------|----------|-------|--------|-----------------------------|-----|------------------------|
| NiTSC-OCH <sub>3</sub> / TFA                             | 4        | 4.2   | 63     | 0.014                       | 2   | 11                     |
| NiTSC-OCH <sub>3</sub> / TFA                             | 16       | 51.2  | 80     | 0.170                       | 21  | 90                     |
| CoTSC-OCH <sub>3</sub> / Et <sub>3</sub> NH <sup>+</sup> | 4        | 19.1  | 65     | 0.072                       | 9   | 130                    |

## 4.2 Overpotential determinations

Following a previously reported protocol,<sup>1</sup> the overpotential values,  $\eta$ , of NiTSC-OCH<sub>3</sub> and CoTSC-OCH<sub>3</sub> complexes were calculated as the difference between the mid-wave catalytic potential ( $E_{1/2}^{cat}$ ) and the theoretical half-wave potential ( $E_{1/2}^T$ ) such as:

$$\eta = E_{1/2}^{cat} - E_{1/2}^T \quad (1)$$

The value of  $E_{1/2}^T$  depends on the standard potential for proton reduction in DMF ( $E_{H^+/H_2}^0$ ), the  $pK_a$  of the proton source, the total acid concentration ( $C_0$ ), the dissolved hydrogen concentration ( $C_{H_2}^0$ ), and the difference in diffusion coefficients between the acid and H<sub>2</sub> ( $\epsilon_D$ ). In the case of TFA in DMF, homoconjugation is negligible and the theoretical half-wave potential,  $E_{1/2}^T$ , is calculated as follows:

$$E_{1/2}^T = E_{H^+/H_2}^0 - (2.303 \times RT/F) \times pK_a + \epsilon_D - (RT/2F) \times \ln(C_0/C_{H_2}^0) \quad (2)$$

The relevant values of  $E_{H^+/H_2}^0$  (-0.62 V),  $pK_a$  (6.0 and 9.3 for TFA and Et<sub>3</sub>NHBF<sub>4</sub> in DMF, respectively),  $\epsilon_D$  (0.04 ± 0.005 V) and  $C_{H_2}^0$  (1.9.10<sup>-3</sup> M), were obtained from literature.<sup>1,2</sup> We used  $R = 8.31 \text{ J.K}^{-1}.\text{mol}^{-1}$ ,  $T = 298 \text{ K}$ ,  $F = 96500 \text{ C.mol}^{-1}$  and  $C_0 = 0.1 \text{ M}$  for Et<sub>3</sub>NHBF<sub>4</sub> and  $C_0 = 0.06 \text{ M}$  for TFA.

**Table S3.** Calculated overpotential values,  $\eta$ , for NiTSC-OCH<sub>3</sub> and CoTSC-OCH<sub>3</sub> complexes.

| Complex / proton source                                  | $E_{1/2}^{cat}$ (V vs. Fc <sup>+0</sup> ) | $\eta$ (V vs. Fc <sup>+0</sup> ) |
|----------------------------------------------------------|-------------------------------------------|----------------------------------|
| CoTSC-OCH <sub>3</sub> / TFA                             | -1.28                                     | 0.294                            |
| NiTSC-OCH <sub>3</sub> / TFA <sup>6</sup>                | -1.33                                     | 0.344                            |
| CoTSC-OCH <sub>3</sub> / Et <sub>3</sub> NH <sup>+</sup> | -1.48                                     | 0.311                            |
| NiTSC-OCH <sub>3</sub> / Et <sub>3</sub> NH <sup>+</sup> | -2.08                                     | 0.908                            |

## 5. DFT calculations

We used the same methodology employed in our previous computational investigation of NiTSC-OCH<sub>3</sub> and CoTSC-OCH<sub>3</sub> catalysts. All DFT calculations were performed with ORCA program package,<sup>7,8</sup> using BP86/def2-TZVP(-f).<sup>9-12</sup> Solvation effects from DMF were included with the CPCM implicit solvation.<sup>7</sup> Oxidation states of NiTSC-OCH<sub>3</sub> and CoTSC-OCH<sub>3</sub> were determined in our previous work.<sup>13,14</sup> For the open-shell singlets, we performed Broken-Symmetry DFT calculations, using the “FlipSpin” feature of ORCA.<sup>14,15</sup> Cartesian coordinates were obtained from our previous work, where the metal center was substituted accordingly.<sup>13,14</sup> Free energy calculations were performed with the Numerical Harmonic Analysis feature of ORCA, using the “NumFreq” keyword. Finally, all potential energy surface (PES) scans were performed with a single distance constraint. The transition states were approximated as the highest point of these scans. We confirmed that those were good approximations by verifying that only one single imaginary frequency was present. All chemical structure images were generated using Chemcraft.<sup>16</sup>

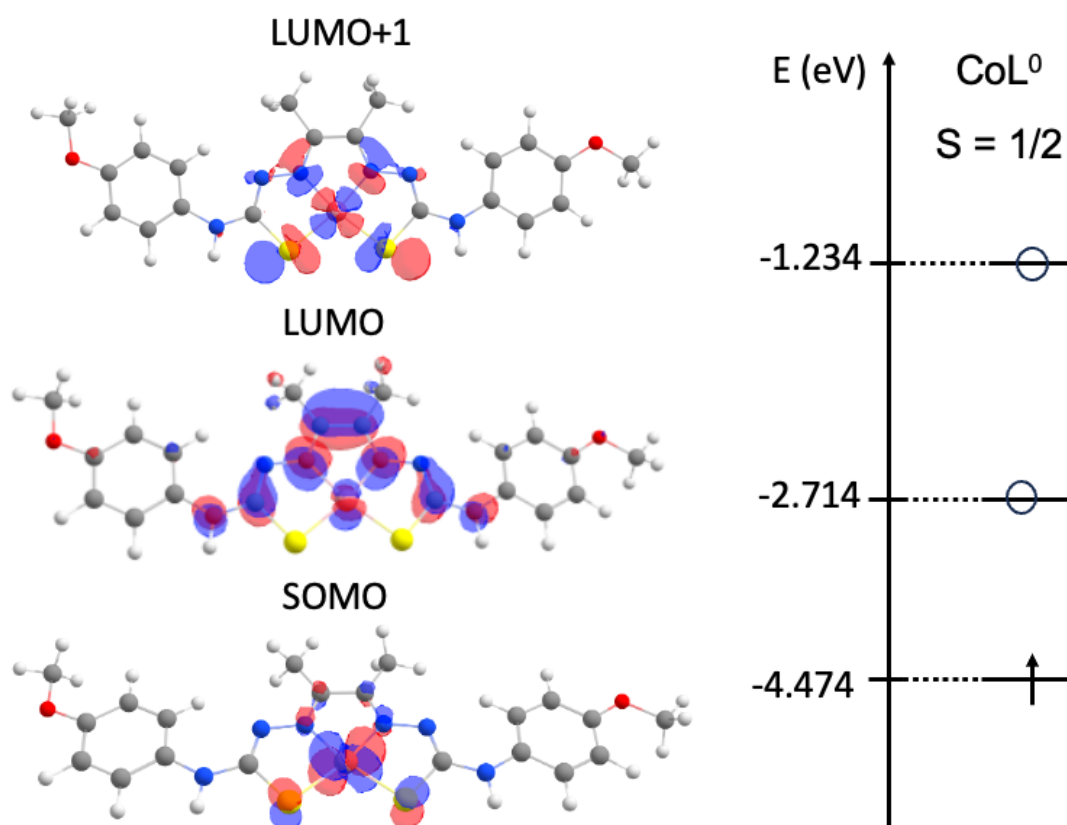

**Figure S7.** Frontier orbitals of CoTSC-OCH<sub>3</sub> together with their corresponding energies.

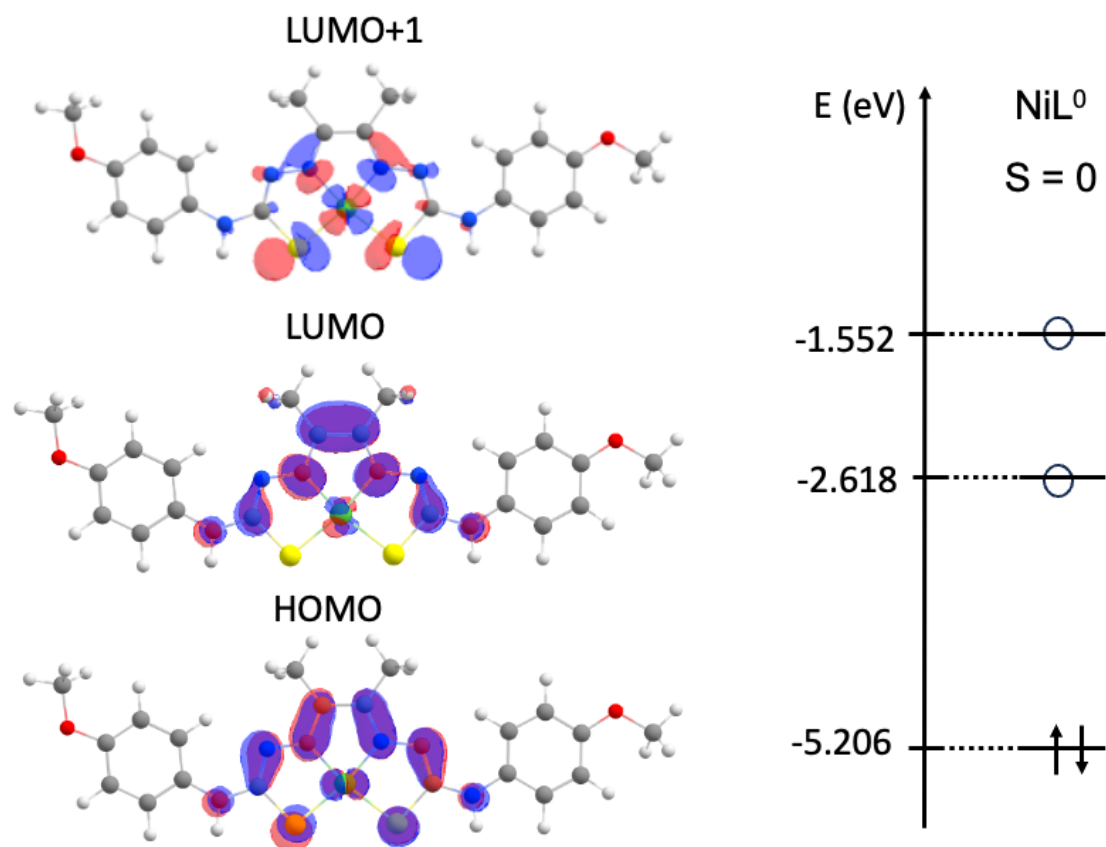

**Figure S8.** Frontier orbitals of NiTSC-OCH<sub>3</sub> together with their corresponding energies.

**Table S4.** PES scan for the distance between the two protons forming H<sub>2</sub> for the three-proton mechanism in NiTSC-OCH<sub>3</sub> and CoTSC-OCH<sub>3</sub>, in the presence of TFA<sup>-</sup>. Energies shifted to the lowest energy point, which corresponds to the reactant state, prior to H<sub>2</sub> formation.

| H-H (Å) | E <sub>Ni</sub> (kcal·mol <sup>-1</sup> ) | E <sub>Co</sub> (kcal·mol <sup>-1</sup> ) |
|---------|-------------------------------------------|-------------------------------------------|
| 0.75    | 4.32                                      | 3.48                                      |
| 0.80    | 5.17                                      | 4.39                                      |
| 0.85    | 6.72                                      | 6.98                                      |
| 0.90    | 10.21                                     | 8.50                                      |
| 0.95    | 41.44                                     | 40.79                                     |
| 1.00    | 55.75                                     | 54.59                                     |
| 1.05    | 49.81                                     | 48.76                                     |
| 1.10    | 44.50                                     | 43.44                                     |
| 1.15    | 39.65                                     | 38.63                                     |
| 1.20    | 35.53                                     | 34.28                                     |
| 1.25    | 31.61                                     | 30.36                                     |
| 1.30    | 28.08                                     | 26.85                                     |
| 1.35    | 24.93                                     | 23.71                                     |



|      |       |       |
|------|-------|-------|
| 1.40 | 23.19 | 21.68 |
| 1.45 | 20.21 | 18.79 |
| 1.50 | 17.41 | 16.08 |
| 1.55 | 14.70 | 13.57 |
| 1.60 | 12.22 | 11.26 |
| 1.65 | 9.98  | 9.11  |
| 1.70 | 8.05  | 7.22  |
| 1.75 | 6.30  | 5.57  |
| 1.80 | 4.79  | 4.18  |
| 1.85 | 3.46  | 2.98  |
| 1.90 | 2.41  | 1.95  |
| 1.95 | 1.55  | 1.16  |
| 2.00 | 0.88  | 0.57  |
| 2.05 | 0.40  | 0.17  |
| 2.10 | 0.09  | -0.04 |
| 2.15 | 0.00  | -0.08 |
| 2.20 | 0.05  | 0.00  |
| 2.25 | 0.25  | 0.30  |
| 2.30 | 0.57  | 0.73  |
| 2.35 | 1.00  | 1.35  |

### Cartesian coordinates from DFT calculations

- Cartesian coordinates of  $\text{CoLH}^0$  after the first PCET step (proton at  $\text{N}_d$ ), in the presence of  $\text{TFA}^-$  ( $M_s=0$ ).

|    |                   |                   |                   |
|----|-------------------|-------------------|-------------------|
| C  | 7.30243067759414  | 16.04151515485567 | 8.22103614386849  |
| C  | 7.58384486906056  | 17.40569794616451 | 8.03344380568132  |
| C  | 8.79119014070075  | 17.92569787169609 | 8.51983598068377  |
| C  | 9.70770296073331  | 17.11305223642473 | 9.18910947563927  |
| C  | 9.41813850515335  | 15.75420624308887 | 9.38370489996213  |
| C  | 8.21109981137590  | 15.23011974033366 | 8.88986071261670  |
| N  | 6.74469783683684  | 18.29112064577918 | 7.31035297891280  |
| C  | 5.44337227251992  | 18.21108667371634 | 6.95622524392280  |
| S  | 4.83362230195408  | 19.28553248121777 | 5.73220904280824  |
| Co | 2.75357746094338  | 18.60803326447889 | 5.81461868075965  |
| N  | 3.29078973196576  | 17.38915519621284 | 7.06994544032756  |
| N  | 4.61356991988947  | 17.31838240155242 | 7.54255984820281  |
| O  | 10.23914605468417 | 14.86831980473849 | 10.03081623380984 |
| C  | 11.48017202433841 | 15.37847176520947 | 10.55212500061365 |
| N  | 1.13012881722846  | 17.74903430123848 | 6.06368400096097  |
| C  | 1.10815344255913  | 16.71444650458606 | 6.92540826816339  |
| C  | 2.39265422311222  | 16.48117186408782 | 7.51192408309284  |

|   |                   |                   |                   |
|---|-------------------|-------------------|-------------------|
| C | 2.75237842509322  | 15.34941084955624 | 8.42062552112168  |
| N | -0.05228823739596 | 18.08098556971348 | 5.42269411724383  |
| C | 0.12754046709626  | 19.08991931360552 | 4.60040937397483  |
| S | 1.72107514535082  | 19.89262935174297 | 4.37939608094017  |
| N | -0.88834975556019 | 19.60543201693809 | 3.84828012175023  |
| C | -2.24481502925454 | 19.24586388478090 | 3.74313148027684  |
| C | -2.84508221722188 | 18.19408286176985 | 4.45192641492826  |
| C | -4.20522975495692 | 17.90742792550358 | 4.27792033070908  |
| C | -4.98488034373509 | 18.66617706336758 | 3.39548377506706  |
| C | -4.38573571011323 | 19.72277809814075 | 2.68524503081692  |
| C | -3.03867832550299 | 20.00634294905462 | 2.85730219954728  |
| O | -6.32164047166838 | 18.46256282745058 | 3.15673932060536  |
| C | -6.95848905109032 | 17.38389190501844 | 3.86379945867302  |
| C | -0.13615629921508 | 15.92966372620912 | 7.19618663040786  |
| O | 4.83463258593144  | 17.55405668686906 | 10.22720619638913 |
| C | 5.04013725788137  | 16.74775379176170 | 11.18210823880584 |
| C | 5.39158550061254  | 17.48948085180485 | 12.52656465645949 |
| F | 4.33989430500581  | 18.25544923342401 | 12.95720197178972 |
| O | 4.99137089846298  | 15.50589259453427 | 11.22248222954589 |
| F | 5.69911398767436  | 16.64253614645527 | 13.54617725248743 |
| F | 6.45814384288735  | 18.33199920492454 | 12.38214940750245 |
| H | -0.60852353597707 | 20.38735732846862 | 3.25985170989643  |
| H | 7.22083437864763  | 19.10225029675784 | 6.91780648712102  |
| H | 10.63582837161145 | 17.55028286853640 | 9.55307301178102  |
| H | -2.58529899043523 | 20.82900003510048 | 2.29951535107137  |
| H | -4.99208241458897 | 20.31490806728826 | 1.99811508691137  |
| H | -4.64110745755028 | 17.08431097170574 | 4.84223002571219  |
| H | 9.02153389543002  | 18.98252029017679 | 8.37012654075711  |
| H | -2.24383828933442 | 17.60246276180948 | 5.13842983150934  |
| H | -0.93797931978314 | 16.58248775366363 | 7.57420604853824  |
| H | 0.04406799314787  | 15.14106078278805 | 7.93513614850930  |
| H | -0.51731165546375 | 15.46159558973196 | 6.27521446819773  |
| H | 6.38261853937775  | 15.60538957969058 | 7.83648824352640  |
| H | 1.86553173226069  | 14.76263734867639 | 8.68307487697846  |
| H | 3.22489761063505  | 15.68927176259930 | 9.35426899937829  |
| H | 3.47146316668057  | 14.67186918027296 | 7.92943420393841  |
| H | 7.99434612248232  | 14.17109194627234 | 9.03614177660514  |
| H | -8.00264908049472 | 17.39057510196156 | 3.53364229946771  |
| H | -6.91282628887870 | 17.54175956782545 | 4.95237976923521  |
| H | -6.49604619389052 | 16.41725993162038 | 3.61114506510481  |
| H | 12.11475436430801 | 15.77526086672380 | 9.74503508383131  |
| H | 11.97474245493252 | 14.52291350416288 | 11.02372466503258 |
| H | 11.30038783110047 | 16.16322403908670 | 11.30263302587558 |
| H | 4.72994449485092  | 17.16805247707373 | 8.59394563195228  |

- Cartesian coordinates of CoHLH<sup>+</sup> after the first PCET step (proton at N<sub>d</sub>), followed by a proton transfer (proton at Co) in the presence of TFA<sup>-</sup> (M<sub>s</sub> = 0).

|    |                   |                   |                   |
|----|-------------------|-------------------|-------------------|
| C  | -3.31877181021412 | 19.88755122628708 | 2.98897841268540  |
| C  | -2.50001896566073 | 19.09179368452383 | 3.81807422074525  |
| C  | -3.01443735850175 | 17.89257315189798 | 4.33280171356250  |
| C  | -4.31869926664054 | 17.49524598962860 | 4.02283380581559  |
| C  | -5.12715340334600 | 18.29031440369788 | 3.19700709270019  |
| C  | -4.61193068383492 | 19.49496119494026 | 2.68204975082995  |
| N  | -1.20123231355657 | 19.58013093210928 | 4.06838868081111  |
| C  | -0.16267424862384 | 19.06390468569965 | 4.76691001614109  |
| S  | 1.33687725721028  | 20.03888550857879 | 4.75431004431566  |
| Co | 2.43333215837069  | 18.67955435051532 | 6.04933772347941  |
| N  | 0.90707861846903  | 17.58769686741241 | 6.02723912086968  |
| N  | -0.26135770598612 | 17.90784134582895 | 5.40719960015513  |
| O  | -6.41182182280301 | 17.98714807476278 | 2.83986595575284  |
| C  | -6.97054713774247 | 16.76144924659597 | 3.35082105355044  |
| S  | 4.41943912255349  | 19.57818283489404 | 6.12243795923354  |
| C  | 5.13440326990267  | 18.35906199122924 | 7.15898969825810  |
| N  | 4.41824470805826  | 17.29329857562944 | 7.57239463317868  |
| N  | 3.13239414934189  | 17.26731716293552 | 7.06024154791761  |
| C  | 2.34273968800088  | 16.21897247292034 | 7.23194257779020  |
| C  | 2.75081281192929  | 14.95224082165908 | 7.90476067442479  |
| N  | 6.41425715437371  | 18.52141831635287 | 7.53198993730492  |
| C  | 7.33099589524075  | 17.61665767165736 | 8.13243301084433  |
| C  | 7.25655529516645  | 16.22443461234658 | 7.95944691063600  |
| C  | 8.22320913457353  | 15.40447326338746 | 8.52562922435964  |
| C  | 9.28435895772409  | 15.95267439154538 | 9.26951360434478  |
| C  | 9.37014761304062  | 17.34483476458473 | 9.42758783707285  |
| C  | 8.39495718623741  | 18.16514876119940 | 8.85893904009150  |
| O  | 10.17612456022281 | 15.05690485851404 | 9.78784461249770  |
| C  | 11.27838234238398 | 15.58303651713950 | 10.55265445904831 |
| C  | 1.02274381955580  | 16.42097388150064 | 6.64958157510414  |
| C  | -0.08904214347495 | 15.42835468062913 | 6.71502755291545  |
| O  | 4.69323468813441  | 18.60076904343805 | 10.72400129976475 |
| C  | 4.66763372677910  | 17.37237436592189 | 10.86587523608729 |
| O  | 4.60679268109945  | 16.44450349760764 | 9.98817048115263  |
| C  | 4.69216492750530  | 16.79822335214591 | 12.32748502492224 |
| F  | 4.87584898395199  | 17.76222886829379 | 13.26479337723587 |
| F  | 3.51353175411999  | 16.17111534373543 | 12.62487176026298 |
| F  | 5.68639541622340  | 15.87993338167226 | 12.49875054521840 |
| H  | -0.99883026437796 | 20.47572398575233 | 3.62543207205610  |
| H  | 6.79728670508920  | 19.44056617671478 | 7.31201604159412  |

|   |                   |                   |                   |
|---|-------------------|-------------------|-------------------|
| H | 10.18410269178445 | 17.79963066173010 | 9.98909845619051  |
| H | -2.92709742733470 | 20.82278697893035 | 2.58376095902630  |
| H | -5.24096014117823 | 20.11297049461840 | 2.04012953393123  |
| H | -4.69196183908317 | 16.56020601264240 | 4.43724495595596  |
| H | 8.46273800105622  | 19.24740404432239 | 8.98392536277113  |
| H | -2.39553712298786 | 17.27136621682508 | 4.97501735125364  |
| H | -1.03029512481822 | 15.93259177437641 | 6.97396870826402  |
| H | 0.11651437149286  | 14.65119198966058 | 7.45873063631561  |
| H | -0.24049513716039 | 14.94335211103153 | 5.73718089064926  |
| H | 6.45568718145423  | 15.77978092702470 | 7.37113756451496  |
| H | 2.26927504363987  | 14.09363513765188 | 7.42049929535861  |
| H | 2.45276436595455  | 14.95319677422372 | 8.96485793481816  |
| H | 3.83784903773142  | 14.81862401530339 | 7.86317157207157  |
| H | 8.17375117135776  | 14.32311472895611 | 8.39181150503492  |
| H | -7.98790301522981 | 16.71338377258797 | 2.94924236417210  |
| H | -7.00482130632802 | 16.77289179551840 | 4.45057787738796  |
| H | -6.39255983073645 | 15.89123508013713 | 3.00523887794216  |
| H | 11.90695353098106 | 16.24167739930562 | 9.93485573452910  |
| H | 11.85735071593679 | 14.70995321435513 | 10.87041634883894 |
| H | 10.91803488743979 | 16.13194356005037 | 11.43549958096287 |
| H | 4.55530554703611  | 16.90570628007259 | 8.63946020635869  |
| H | 1.96737789849627  | 19.35770577479003 | 7.22649039892101  |

- Cartesian coordinates of CoHLH<sup>0</sup> after PCET and proton transfer step (protons at N<sub>d</sub> and Co), followed by a reduction in the presence of TFA (S = ½).

|    |                   |                   |                  |
|----|-------------------|-------------------|------------------|
| C  | -3.21356481374867 | 18.62242882688124 | 1.39327219649187 |
| C  | -2.50956396623530 | 18.25643323483825 | 2.56249508260241 |
| C  | -3.19409057382464 | 17.54607093081338 | 3.56172452043909 |
| C  | -4.54488905539506 | 17.21100003272176 | 3.39716679622989 |
| C  | -5.23331997237292 | 17.57880524147588 | 2.23461431493688 |
| C  | -4.55073947967415 | 18.29055919298623 | 1.23096926700021 |
| N  | -1.15933962751151 | 18.63514293446387 | 2.63584810776184 |
| C  | -0.21728956700221 | 18.45228847271325 | 3.61701831906285 |
| S  | 1.40757624278438  | 19.08478802079497 | 3.25485601063302 |
| Co | 2.23560471831136  | 18.59400360799428 | 5.23026827825064 |
| N  | 0.59797342468780  | 17.77780193007630 | 5.57539422230828 |
| N  | -0.49960438578504 | 17.84790746785447 | 4.75333897316850 |
| O  | -6.55472576805634 | 17.29726125017160 | 1.98119518540343 |
| C  | -7.27508924981919 | 16.57020837376237 | 2.99102975345994 |
| S  | 4.37641195111823  | 19.06815807321529 | 5.03079919671313 |
| C  | 4.84553399276885  | 18.55301232948612 | 6.62333495800628 |
| N  | 3.93556139150423  | 17.96680115163007 | 7.42830664807692 |
| N  | 2.67587147869686  | 17.81873211675823 | 6.86044151167510 |

|   |                   |                   |                   |
|---|-------------------|-------------------|-------------------|
| C | 1.70467972490353  | 17.12446512690179 | 7.49712832821461  |
| C | 1.94391834625599  | 16.42946162397220 | 8.79942219519009  |
| N | 6.12015600280455  | 18.77350490885822 | 7.03820918332099  |
| C | 6.90012520599853  | 18.14611500410229 | 8.03966525977856  |
| C | 6.56190508060920  | 16.92298992957308 | 8.64423197898487  |
| C | 7.41760505072704  | 16.34626496014704 | 9.57590255426940  |
| C | 8.62669611975742  | 16.96918712384902 | 9.92780791411591  |
| C | 8.97194323271999  | 18.18691015102700 | 9.32303677024928  |
| C | 8.10889121168738  | 18.76495558643910 | 8.39035775609041  |
| O | 9.39339299451715  | 16.31613149441328 | 10.85941369947653 |
| C | 10.63593987854451 | 16.93422077313761 | 11.23919165770977 |
| C | 0.49220562309719  | 17.11718450542788 | 6.75400974883765  |
| C | -0.78904582110116 | 16.46304085528063 | 7.16624905922768  |
| O | 4.01493994576626  | 19.01649281052995 | 9.89320239714452  |
| C | 4.17007271555868  | 18.53401325660107 | 11.05561544825507 |
| O | 4.14464704014145  | 17.35974544754067 | 11.45934054015043 |
| C | 4.41626356196425  | 19.65404459195317 | 12.13531088059495 |
| F | 5.49736780848482  | 20.43155038103095 | 11.82484595952531 |
| F | 3.33997956864326  | 20.49624479656424 | 12.23160122102980 |
| F | 4.63699679690671  | 19.16048369098467 | 13.38387165621200 |
| H | -0.81380048374912 | 19.13952928168443 | 1.82283862011540  |
| H | 6.63524097898807  | 19.41454707546487 | 6.43738539070608  |
| H | 9.90284484693822  | 18.69537712084444 | 9.56840038606224  |
| H | -2.69650905330612 | 19.17507206242202 | 0.60533905575483  |
| H | -5.08519459453867 | 18.57876031355710 | 0.32432290054184  |
| H | -5.04512083301108 | 16.65954072029053 | 4.19211068565160  |
| H | 8.38375020397529  | 19.71220569006603 | 7.92179664308001  |
| H | -2.66662444762978 | 17.25775653584699 | 4.46799396406358  |
| H | -1.59829165512870 | 17.20440465971158 | 7.26031770780508  |
| H | -0.68209486707123 | 15.94908325556213 | 8.12807377970428  |
| H | -1.11840275460790 | 15.72927050033363 | 6.41431305204870  |
| H | 5.63787055596952  | 16.40987405675552 | 8.38497829375468  |
| H | 1.08199384321984  | 15.81516821312006 | 9.08083059061916  |
| H | 2.14513969943402  | 17.13580266921523 | 9.61854421344947  |
| H | 2.82476345444443  | 15.77100373466701 | 8.72929145822049  |
| H | 7.15517319886986  | 15.39661705533320 | 10.04425362126798 |
| H | -8.29151235974923 | 16.45099379602823 | 2.60090578980298  |
| H | -7.30548926429743 | 17.13098474785892 | 3.93813758604475  |
| H | -6.82603084541523 | 15.57974218702545 | 3.16330985986834  |
| H | 11.30942651507889 | 17.03318437407826 | 10.37398636536014 |
| H | 11.08401685689531 | 16.26424427832029 | 11.98049163916927 |
| H | 10.46420221680407 | 17.92376691643729 | 11.68973519616504 |
| H | 3.98675619543764  | 18.16526519465375 | 8.48219506961228  |
| H | 1.84893376401658  | 19.88738235375203 | 5.81452758053397  |

- Cartesian coordinates of CoH-LH<sub>2</sub><sup>+</sup> after third proton transfer step (protons at both N<sub>d</sub> and Co) in presence of TFA<sup>-</sup> (S = ½)

|    |                   |                   |                   |
|----|-------------------|-------------------|-------------------|
| C  | 7.96845201720491  | 18.72542697783052 | 8.37977954034094  |
| C  | 6.82985657108870  | 18.10531686061826 | 7.84927479853697  |
| C  | 6.57212868179495  | 16.76026873625231 | 8.16510411889652  |
| C  | 7.43319058791939  | 16.06600214798089 | 9.00567331146719  |
| C  | 8.57108018948186  | 16.69160243480873 | 9.54534011265920  |
| C  | 8.83935660960099  | 18.02983569332345 | 9.22075323478991  |
| N  | 6.03150812380545  | 18.85764944808241 | 6.95052269080929  |
| C  | 4.74325350659328  | 18.69739610044653 | 6.57003640729412  |
| N  | 3.88012459094668  | 17.97120585114049 | 7.30622340921952  |
| N  | 2.60566564557525  | 17.89039337175355 | 6.76984925486209  |
| C  | 1.67351724724679  | 17.07475528801118 | 7.31278974000897  |
| C  | 0.42681655910496  | 17.16641343489729 | 6.62887198031308  |
| C  | -0.83203568035426 | 16.43586129850570 | 6.96778243600939  |
| O  | 9.35021139253605  | 15.91841946192531 | 10.36436093447032 |
| C  | 10.52212613948887 | 16.53165622325216 | 10.93333766762393 |
| S  | 4.19952020938823  | 19.47099151111987 | 5.10614615258781  |
| Co | 2.09172118600367  | 18.91842925260705 | 5.30897352849424  |
| N  | 0.49743871727034  | 18.02478597107297 | 5.58920630257166  |
| N  | -0.59532634058306 | 18.27376679197722 | 4.79218585603245  |
| C  | -0.41226478657237 | 19.10138619991037 | 3.74494679130891  |
| S  | 1.17373016744588  | 19.75220687096169 | 3.48309500172361  |
| N  | -1.43995763430944 | 19.41878984449841 | 2.92778840198313  |
| C  | -2.75949075631896 | 18.88714526958093 | 2.93371484338670  |
| C  | -3.83688587817772 | 19.76755435651955 | 2.73234625308906  |
| C  | -5.13812780817491 | 19.28494105323610 | 2.69441765464374  |
| C  | -5.39329765158392 | 17.91188102169504 | 2.87085402872095  |
| C  | -4.31963062660475 | 17.02900773498486 | 3.06208742415769  |
| C  | -3.00949555618638 | 17.51706094132705 | 3.08038061617235  |
| O  | -6.70682450415439 | 17.53811627068554 | 2.83334590340395  |
| C  | -7.00363687725350 | 16.13769206213736 | 3.00009248382076  |
| C  | 1.95903528623761  | 16.16470651145704 | 8.46349633264253  |
| O  | 4.20630752998280  | 20.35789731353725 | 9.81654891757921  |
| C  | 4.13822156777329  | 19.26518538006452 | 10.39985877186516 |
| C  | 4.18181701891070  | 19.27810223506163 | 11.97179782948262 |
| F  | 3.04464224789114  | 18.73744737177902 | 12.50711384990927 |
| O  | 4.02980387296802  | 18.08671830503888 | 9.93212741826381  |
| F  | 5.23178795136526  | 18.54732343346336 | 12.45241442705859 |
| F  | 4.30303657874603  | 20.52863663592525 | 12.48972653231785 |
| H  | -1.25800081431725 | 20.19219718836990 | 2.29055752179328  |
| H  | 6.52103374341856  | 19.59963073391826 | 6.45282241419184  |

|   |                   |                   |                   |
|---|-------------------|-------------------|-------------------|
| H | 9.71555136113142  | 18.54123708329081 | 9.61539207465303  |
| H | -3.64673955188929 | 20.83463538597491 | 2.60736807279421  |
| H | -5.97657794343867 | 19.96475783182995 | 2.53751743362368  |
| H | -4.48483411643288 | 15.95936132616038 | 3.17687970639719  |
| H | 8.17974473722615  | 19.76728722380897 | 8.13147031836782  |
| H | -2.18428962399034 | 16.80999970969026 | 3.17258556078968  |
| H | -1.64229971067905 | 17.13328017451582 | 7.23934345160784  |
| H | -0.68165999016039 | 15.76533889283245 | 7.81983918151897  |
| H | -1.18247019856994 | 15.82484823154162 | 6.11976360164055  |
| H | 5.70780440433558  | 16.24845195418930 | 7.74520530723803  |
| H | 1.18308081735562  | 15.39673675835755 | 8.55337106820729  |
| H | 2.01853044407315  | 16.71178957514872 | 9.41638319823596  |
| H | 2.92583350430112  | 15.65885059328070 | 8.32113858264236  |
| H | 7.23748181557457  | 15.02091099408051 | 9.25000991861867  |
| H | -8.09436337807894 | 16.06130228320319 | 2.94632023074425  |
| H | -6.65281381955371 | 15.77489675832452 | 3.97785846188554  |
| H | -6.54873182864680 | 15.54084179042195 | 2.19549992962573  |
| H | 11.22003293509193 | 16.85538162788517 | 10.14625406297644 |
| H | 10.99144011746758 | 15.75550080545975 | 11.54669139096180 |
| H | 10.25047773263836 | 17.39075597501098 | 11.56517580106522 |
| H | 3.97717020399060  | 17.98285200531008 | 8.40538812615134  |
| H | -1.52773881156282 | 17.99316929420192 | 5.10366686222688  |
| H | 1.74443987461800  | 20.08369413572264 | 6.12228976352482  |

- Cartesian coordinates of **Co-LH<sub>3</sub><sup>+</sup>** after third proton transfer step (protons at both N<sub>d</sub> and N<sub>Co</sub>) in presence of TFA<sup>-</sup>, used for the H<sub>2</sub> potential energy surface scan to study tunnelling (S = ½)

|   |                   |                   |                   |
|---|-------------------|-------------------|-------------------|
| C | 8.32365589592105  | 17.95861337334109 | 8.27863836634352  |
| C | 7.12141754456418  | 17.43769486581538 | 7.78679190056211  |
| C | 6.77295913491386  | 16.10917910278378 | 8.08153244591083  |
| C | 7.60865033502483  | 15.33202175074604 | 8.87460273466925  |
| C | 8.81271748723110  | 15.85732499874548 | 9.37713674484769  |
| C | 9.17161752266480  | 17.17838105416006 | 9.06738144916938  |
| N | 6.33522273609770  | 18.26885090555353 | 6.93819422358537  |
| C | 5.00014469502412  | 18.33334295907358 | 6.78438266864033  |
| N | 4.18406780278262  | 17.60035955763163 | 7.57484213764445  |
| N | 2.77069145312736  | 17.94703055899150 | 7.46752470276050  |
| C | 1.86446309859737  | 16.78981685839988 | 7.60426134993751  |
| C | 0.71059106674661  | 16.95033466603997 | 6.88834483169935  |
| C | -0.49204635750567 | 16.05832293690385 | 6.94245918555199  |
| O | 9.56185902413301  | 15.00943347262525 | 10.14477943543614 |
| C | 10.80503426560252 | 15.51389564853537 | 10.66965411217677 |
| S | 4.35831333144480  | 19.36175713009423 | 5.53099238806198  |

|    |                   |                   |                   |
|----|-------------------|-------------------|-------------------|
| Co | 2.25967540720051  | 19.00078377878953 | 5.92227258628224  |
| N  | 0.72012929941946  | 18.06130602363438 | 6.05087628357554  |
| N  | -0.38527432884794 | 18.35080833577229 | 5.27707517673783  |
| C  | -0.27152093479261 | 19.38870758171403 | 4.43337264014045  |
| S  | 1.25131432529107  | 20.21528828056077 | 4.40213290684848  |
| N  | -1.31108754504001 | 19.78436722468299 | 3.65097463797212  |
| C  | -2.56369179770238 | 19.14835509790351 | 3.46049298098449  |
| C  | -3.70355499936230 | 19.95669183114457 | 3.29295495980396  |
| C  | -4.94723619272398 | 19.38353811673162 | 3.06292569562812  |
| C  | -5.08809820252283 | 17.98454685166083 | 3.01067444877999  |
| C  | -3.95533292139212 | 17.17364998561004 | 3.16972830305237  |
| C  | -2.70074641585699 | 17.75600858421733 | 3.38130320132478  |
| O  | -6.35681046925015 | 17.51656174247718 | 2.79716819433485  |
| C  | -6.53077322721360 | 16.08909586909813 | 2.72642983800556  |
| C  | 2.22765105587788  | 15.69476175465331 | 8.54880500944533  |
| O  | 2.77290111775377  | 19.32521968150344 | 9.89809735878726  |
| C  | 3.63829102352037  | 18.74537793108232 | 10.60531501662928 |
| C  | 3.68842795841369  | 19.25268626743111 | 12.08894451872299 |
| F  | 4.62375573640500  | 18.62333995390502 | 12.84461722702096 |
| O  | 4.45055296809097  | 17.83428360081898 | 10.29995024606206 |
| F  | 3.96582832537943  | 20.58881409147747 | 12.14019963822759 |
| F  | 2.48498242519656  | 19.07017550329666 | 12.70825361278217 |
| H  | -1.20425807095971 | 20.70834652962008 | 3.23893178760832  |
| H  | 6.85395327393100  | 18.93698164979338 | 6.36962148828590  |
| H  | 10.10041996098577 | 17.61113254698353 | 9.43458691299768  |
| H  | -3.60690263259254 | 21.04259652645490 | 3.34485285019655  |
| H  | -5.82956469740391 | 20.01136843188939 | 2.93112585780667  |
| H  | -4.02782257154025 | 16.08893813378618 | 3.11318424962759  |
| H  | 8.60399476186119  | 18.98675601674216 | 8.04274355420158  |
| H  | -1.82587731656131 | 17.10811064912744 | 3.44245807950513  |
| H  | -1.38037476404274 | 16.60591412105806 | 7.29744927233341  |
| H  | -0.33121116639011 | 15.21911151246520 | 7.62649357549045  |
| H  | -0.72204043295150 | 15.64304706576199 | 5.94877910697840  |
| H  | 5.86013661982227  | 15.67262761700455 | 7.67866758458099  |
| H  | 1.42919796457349  | 14.94572297193414 | 8.60007977490115  |
| H  | 2.40753674672527  | 16.07196468275488 | 9.56873495166964  |
| H  | 3.14645057023500  | 15.17592140825711 | 8.22981469353482  |
| H  | 7.34400364445836  | 14.29917991541213 | 9.10476800334887  |
| H  | -7.60057737751269 | 15.93159466491561 | 2.55487396952487  |
| H  | -6.23093983243897 | 15.60804666743987 | 3.66983214761887  |
| H  | -5.95398912112573 | 15.66232004311810 | 1.89195801014685  |
| H  | 11.48902518473893 | 15.79958490283607 | 9.85635526394389  |
| H  | 11.23740598815743 | 14.68768469774205 | 11.24326208884469 |
| H  | 10.63259657127967 | 16.37571658856323 | 11.33165718384442 |



|   |                   |                   |                  |
|---|-------------------|-------------------|------------------|
| H | 2.62107490400571  | 18.58041242257491 | 8.31086714720219 |
| H | 4.45361631636036  | 17.51958378872563 | 8.59893085379418 |
| H | -1.29229716782904 | 17.94230451743331 | 5.51095843386731 |

- Cartesian coordinates of  $\text{NiLH}^0$  after successive reduction and proton transfer steps (proton at  $\text{N}_d$ ,  $S=\frac{1}{2}$ ).

|    |                   |                   |                   |
|----|-------------------|-------------------|-------------------|
| C  | -2.79710519914366 | 18.16151836387775 | 4.58108724007778  |
| C  | -2.21019245144145 | 19.13894088186046 | 3.76151101814720  |
| C  | -3.04004599558704 | 19.86816568479837 | 2.88067427326652  |
| C  | -4.40540739875369 | 19.62860793705286 | 2.82316414016108  |
| C  | -4.99028180403173 | 18.64855553679179 | 3.64642059221972  |
| C  | -4.17625767493111 | 17.91990492901882 | 4.52280648965326  |
| N  | -0.84093711043408 | 19.45061295464436 | 3.74833805368446  |
| C  | 0.21142529567540  | 18.94970587524001 | 4.47009741477806  |
| N  | 0.05998423130340  | 17.97322823755692 | 5.34246033298196  |
| N  | 1.22234199062466  | 17.69539369498749 | 6.00059347175299  |
| C  | 1.27773094028572  | 16.63331281980619 | 6.84090760084232  |
| C  | 0.07332758871461  | 15.78632166251600 | 7.10319466671893  |
| O  | -6.34662638263605 | 18.48380529107095 | 3.51759393164818  |
| C  | -6.97230971829224 | 17.48804974428189 | 4.34084012849341  |
| Ni | 2.85380591263469  | 18.53451730194399 | 5.64447376268338  |
| S  | 1.79233373865647  | 19.69912313212715 | 4.13970224084720  |
| N  | 3.49578144872308  | 17.23050715912500 | 6.80092200353419  |
| C  | 2.57193746807164  | 16.43561401621374 | 7.39514490123570  |
| C  | 2.93744852505048  | 15.49800020801463 | 8.50034519057566  |
| N  | 4.77056784695880  | 17.34457691217995 | 7.30376747051739  |
| C  | 5.55669692895385  | 18.30603859048452 | 6.79453752373224  |
| S  | 4.85306907322923  | 19.44766650157863 | 5.69520451207964  |
| N  | 6.86921577008667  | 18.38398569277378 | 7.13293911302297  |
| C  | 7.63844383509134  | 17.45624631807916 | 7.88282925740995  |
| C  | 8.57508887784279  | 17.94553610217793 | 8.80228561786432  |
| C  | 9.38828246619012  | 17.07324410869592 | 9.52942639608249  |
| C  | 9.25711987314140  | 15.68644723785865 | 9.35334211528973  |
| C  | 8.32323675390396  | 15.19351830633445 | 8.42457382062694  |
| C  | 7.53041726283437  | 16.06683341907239 | 7.68757413777053  |
| O  | 9.98980725705202  | 14.74796295368570 | 10.02345260207704 |
| C  | 10.96392825535608 | 15.21430764953655 | 10.97281601729209 |
| H  | -0.57770003669340 | 20.17846537965712 | 3.08786818520505  |
| H  | 7.31309553133282  | 19.27335561491674 | 6.91385473589202  |
| H  | 10.10923169625923 | 17.48484026674603 | 10.23365414521121 |
| H  | -2.59943894388634 | 20.63183477661629 | 2.23543511909498  |
| H  | -5.03791255157909 | 20.19698120214918 | 2.13940168031227  |
| H  | -4.59918862137558 | 17.15445480563429 | 5.17204117755608  |
| H  | 8.67090609674053  | 19.02237571529174 | 8.95143413760994  |
| H  | -2.17132619095049 | 17.59052049065864 | 5.26293537395325  |
| H  | -0.75818017177992 | 16.38992228862499 | 7.49874746552169  |
| H  | 0.29652413143252  | 14.98871213823864 | 7.82081810131330  |
| H  | -0.28807651467876 | 15.32148281752374 | 6.17231529864984  |
| H  | 6.85391667413146  | 15.66348418142445 | 6.93328446262019  |

|   |                   |                   |                   |
|---|-------------------|-------------------|-------------------|
| H | 3.70985110652020  | 14.77572268222447 | 8.18626761153073  |
| H | 2.06692149925964  | 14.92465673764706 | 8.83555326387751  |
| H | 3.32919117644743  | 16.04362464937425 | 9.37593039799333  |
| H | 8.24282085541378  | 14.11640276531628 | 8.27229253201478  |
| H | -8.03689934736113 | 17.51751199236162 | 4.08523955402302  |
| H | -6.84194779305619 | 17.71707617241928 | 5.41016507515869  |
| H | -6.56831790735862 | 16.48581695313653 | 4.12810794997888  |
| H | 11.73038358239940 | 15.83222162295694 | 10.48054094747369 |
| H | 11.42656883666117 | 14.31257614841841 | 11.38709466323054 |
| H | 10.48544378293499 | 15.79009240827105 | 11.77968161565220 |
| H | 5.09504750405662  | 16.70022796700614 | 8.02728246905943  |

- Cartesian coordinates of  $\text{NiLH}_2^+$  after reduction and two successive proton transfer steps (both protons at  $N_d$ ,  $S=1/2$ ).

|    |                   |                   |                  |
|----|-------------------|-------------------|------------------|
| C  | -2.79429351320412 | 18.91568380020055 | 4.95206171061773 |
| C  | -2.16480851753084 | 19.17399614936522 | 3.72793354152906 |
| C  | -2.89217400969443 | 19.03543200206526 | 2.53308855544331 |
| C  | -4.21911909743383 | 18.62838858965822 | 2.56528522308667 |
| C  | -4.84480083521311 | 18.33810491669285 | 3.79261385324009 |
| C  | -4.12461715660855 | 18.48731515545810 | 4.98813245948454 |
| N  | -0.81819776785932 | 19.62702779217472 | 3.65132062129271 |
| C  | 0.25023818607434  | 19.18479376306848 | 4.34649129336522 |
| N  | 0.14603243460626  | 18.10278249017168 | 5.14201279767279 |
| N  | 1.23442193643796  | 17.77597567784653 | 5.90805954335589 |
| C  | 1.29755766755833  | 16.60337820989033 | 6.56919186480774 |
| C  | 0.14463044673178  | 15.65577067411621 | 6.62584685283509 |
| O  | -6.14380428590971 | 17.92971695075576 | 3.71927750854822 |
| C  | -6.82043100317572 | 17.62226397632674 | 4.95141353001728 |
| Ni | 2.83149672915632  | 18.71620808126975 | 5.67960122103715 |
| S  | 1.78207694451339  | 19.98335447777430 | 4.22224838906637 |
| N  | 3.47965844108124  | 17.30417828412224 | 6.71709094794359 |
| C  | 2.58142748818060  | 16.40622398382122 | 7.16689016052944 |
| C  | 2.93172267615245  | 15.36372301962142 | 8.17710920264158 |
| N  | 4.73400410569062  | 17.39120448953391 | 7.26229130674275 |
| C  | 5.49352761479187  | 18.44432056989726 | 6.90412418088011 |
| S  | 4.78620105996415  | 19.69007612681643 | 5.92989901494671 |
| N  | 6.77719130465173  | 18.52969230080933 | 7.30956179266902 |
| C  | 7.54838914456443  | 17.55009905863067 | 7.99535862189875 |
| C  | 8.39339900443519  | 17.96779762343003 | 9.03046246291172 |
| C  | 9.19823519201183  | 17.04934616357616 | 9.70717264427429 |
| C  | 9.15139573744314  | 15.68974480369213 | 9.35733753413443 |
| C  | 8.31059826283447  | 15.27261423924708 | 8.30932624666619 |
| C  | 7.52447136848333  | 16.19344467962300 | 7.62596870942633 |
| O  | 9.88359699060840  | 14.71121896674538 | 9.96230241382283 |

|   |                   |                   |                   |
|---|-------------------|-------------------|-------------------|
| C | 10.76457868409925 | 15.09785581163214 | 11.03246600342829 |
| H | -0.60400466910104 | 20.30561289102770 | 2.92232081258151  |
| H | 7.20912554753835  | 19.44252339465942 | 7.17674354039340  |
| H | 9.84691248381894  | 17.40191511456169 | 10.50704447030987 |
| H | -2.40874253053941 | 19.24705836837296 | 1.57803501753754  |
| H | -4.78799614584252 | 18.51888211814846 | 1.64111708584294  |
| H | -4.59043110479976 | 18.29514863848808 | 5.95288759195519  |
| H | 8.42186789056660  | 19.02165110177573 | 9.31250703766341  |
| H | -2.26661295893188 | 19.08024035275283 | 5.89225709068306  |
| H | -0.73827594053745 | 16.11896872103446 | 7.09594056479771  |
| H | 0.39779183908075  | 14.76015484576078 | 7.20207104188764  |
| H | -0.14640220443197 | 15.32637400201598 | 5.61438214663150  |
| H | 6.92162054613316  | 15.85801548250395 | 6.78132386060370  |
| H | 3.75234877670273  | 14.71766450862051 | 7.82494204764647  |
| H | 2.07265378091621  | 14.72150447864662 | 8.39575987142923  |
| H | 3.25028678859426  | 15.82460541752819 | 9.12727270276221  |
| H | 8.29930122310729  | 14.21984927900590 | 8.02449694526230  |
| H | -7.83045100162028 | 17.31391901526816 | 4.66290854478341  |
| H | -6.87408116761259 | 18.50719249550633 | 5.60337127932377  |
| H | -6.31747290429753 | 16.79939213424015 | 5.48170456578460  |
| H | 11.53075662014193 | 15.80305599840824 | 10.67632326886402 |
| H | 11.24178959328043 | 14.17181147199822 | 11.36889771536772 |
| H | 10.20105015544895 | 15.54878005512029 | 11.86321259369395 |
| H | 5.04773192720825  | 16.70107355305968 | 7.94786838689913  |
| H | -0.68408977826482 | 17.50612973346250 | 5.14329160897983  |

- Cartesian coordinates of  $\text{NiLH}_2^0$  after successive reduction and proton transfer steps (both protons at  $N_d$ ,  $M_s=0$ ).

|    |                   |                   |                  |
|----|-------------------|-------------------|------------------|
| C  | -2.75960723832609 | 18.85282388948297 | 4.83668475586606 |
| C  | -2.14458569416957 | 19.03808939100504 | 3.58910012587431 |
| C  | -2.92926274724936 | 18.92458893124195 | 2.42474429207819 |
| C  | -4.28407071667078 | 18.62822514513648 | 2.50812898662774 |
| C  | -4.89159238272137 | 18.41735834856691 | 3.75911496490526 |
| C  | -4.11954101684782 | 18.53296901839639 | 4.92372608819579 |
| N  | -0.78199334866812 | 19.38712822372680 | 3.45201335282880 |
| C  | 0.28594168870104  | 18.98619894011207 | 4.21306432099655 |
| N  | 0.17719804290345  | 17.96270612645466 | 5.06768948473302 |
| N  | 1.17931993199079  | 17.78615578607587 | 6.01585309983113 |
| C  | 1.29089160460544  | 16.53980375643756 | 6.62220180503664 |
| C  | 0.14818237872587  | 15.57126684335856 | 6.61330174167166 |
| O  | -6.22678999938669 | 18.11182507635245 | 3.73737671725173 |
| C  | -6.87826511725404 | 17.89579818839302 | 4.99936545985324 |
| Ni | 2.80152354759308  | 18.68390938505699 | 5.72552795789977 |
| S  | 1.81030440018705  | 19.79289942047516 | 4.10869828053108 |
| N  | 3.49397748897244  | 17.22153452228014 | 6.67621644989221 |

|   |                   |                   |                   |
|---|-------------------|-------------------|-------------------|
| C | 2.54527274956875  | 16.34335592215759 | 7.18827960678538  |
| C | 2.91121904821621  | 15.33476142683109 | 8.23368039351370  |
| N | 4.65193372036266  | 17.43585211235224 | 7.41623081640698  |
| C | 5.38000489832544  | 18.52706193753555 | 7.15222253514681  |
| S | 4.65865353873495  | 19.76505218600241 | 6.18685564966509  |
| N | 6.66248556830099  | 18.64882762033953 | 7.62220305346157  |
| C | 7.49201200720372  | 17.64720722578193 | 8.17705292455526  |
| C | 8.36930568171249  | 17.99219453461818 | 9.21536921581332  |
| C | 9.24631473266809  | 17.05117806717720 | 9.76184247247802  |
| C | 9.24114496863762  | 15.73159477953167 | 9.28470620590748  |
| C | 8.36727560045848  | 15.38172895636101 | 8.24085562184712  |
| C | 7.51145549975048  | 16.32715157787380 | 7.68429740759794  |
| O | 10.04465022707648 | 14.72931789919355 | 9.76025932974286  |
| C | 10.95482302700154 | 15.05629415993825 | 10.82261310186228 |
| H | -0.53057663304520 | 19.89729138251071 | 2.60913333843086  |
| H | 6.99502326158194  | 19.60650345370875 | 7.70137272285241  |
| H | 9.91697377633355  | 17.35647322758143 | 10.56349420037024 |
| H | -2.46560271136659 | 19.07189290400495 | 1.44738722800708  |
| H | -4.88795540012741 | 18.54396361569013 | 1.60331124594410  |
| H | -4.56424264279579 | 18.39635198111296 | 5.90811224904761  |
| H | 8.36914545769982  | 19.01333119502982 | 9.60182675003483  |
| H | -2.19461242580765 | 18.99101829756059 | 5.75898075032247  |
| H | -0.78487726544918 | 16.02140232608657 | 6.99412422719340  |
| H | 0.37082218304311  | 14.69958190321505 | 7.23974166016095  |
| H | -0.05960142336151 | 15.19351859891135 | 5.59630688144539  |
| H | 6.88202196392387  | 16.04130354576746 | 6.84101388048769  |
| H | 3.77340894348837  | 14.71491523377669 | 7.93249354121794  |
| H | 2.07326257370862  | 14.65628109970840 | 8.43185567631249  |
| H | 3.17082265729109  | 15.81642145330414 | 9.19326010381594  |
| H | 8.38226374826487  | 14.36081324822571 | 7.85623153074864  |
| H | -7.92110557402414 | 17.66432634268572 | 4.75836335500619  |
| H | -6.83506647840157 | 18.79899631950723 | 5.62759758768473  |
| H | -6.42578478535421 | 17.04912529632062 | 5.53872437021753  |
| H | 11.67021532516087 | 15.83155194679167 | 10.50698812317536 |
| H | 11.49202612591643 | 14.12902617155070 | 11.04791825883685 |
| H | 10.41255037593072 | 15.39710396392994 | 11.71821522479823 |
| H | 4.99114111481069  | 16.70035518479413 | 8.03843013474152  |
| H | -0.67115725782393 | 17.39684490997820 | 5.12446074029047  |

## 6. References

- 1 V. Fourmond, P.-A. Jacques, M. Fontecave and V. Artero, *Inorg. Chem.*, 2010, **49**, 10338–10347.
- 2 K. Izutsu, *Acid-Base Dissociation Constants in Dipolar Aprotic Solvents*. Blackwell Scientific: Oxford, U.K. 1990.
- 3 M. Papadakis, A. Barrozo, T. Straistari, N. Queyriaux, A. Putri, J. Fize, M. Giorgi, M. Réglie, J. Massin, R. Hardré and M. Orio, *Dalton Trans.*, 2020, **49**, 5064–5073.
- 4 V. Artero and J.-M. Saveant, *Energy Environ. Sci.*, 2014, **7**, 3808–3814.

- 5 T. Straistari, R. Hardré, J. Fize, S. Shova, M. Giorgi, M. Réglie, V. Artero and M. Orio, *Chemistry A European J*, 2018, **24**, 8779–8786.
- 6 T. Straistari, J. Fize, S. Shova, M. Réglie, V. Artero and M. Orio, *ChemCatChem*, 2017, **9**, 2262–2268.
- 7 F. Neese, *WIREs Comput Mol Sci*, 2012, **2**, 73–78.
- 8 F. Neese, *WIREs Comput Mol Sci*, 2018, **8**, e1327.
- 9 J. P. Perdew, *Phys. Rev. B*, 1986, **33**, 8822–8824.
- 10 J. P. Perdew, *Phys. Rev. B*, 1986, **34**, 7406–7406.
- 11 A. D. Becke, *Phys. Rev. A*, 1988, **38**, 3098–3100.
- 12 A. Schäfer, C. Huber and R. Ahlrichs, *The Journal of Chemical Physics*, 1994, **100**, 5829–5835.
- 13 A. Barrozo and M. Orio, *RSC Adv.*, 2021, **11**, 5232–5238.
- 14 A. Barrozo and M. Orio, *ChemPhysChem*, 2022, **23**, e202200056.
- 15 L. Noodleman, *The Journal of Chemical Physics*, 1981, **74**, 5737–5743.
- 16 Chemcraft - Graphical software for visualization of quantum chemistry computations, <https://www.chemcraftprog.com>.
